# Supplementary material for: Facile synthesis of a CeMnOx catalytic gel with bacterial microenvironment-responsive antibacterial properties
Source: Royal Society of Chemistry journal article supplement (doi:10.1039/d4nj01440e), 2024-01-01
Supplement: d4nj01440e1.pdf [file d4nj01440e1.pdf]

# Electronic Supplementary Information

## Facile synthesis of CeMnO<sub>x</sub> catalytic gel with bacterial microenvironment-responsive antibacterial property

Zicheng Wei<sup>a</sup>, Zhihui Niu<sup>b, \*</sup>, Huihui Xu<sup>c</sup>, Zihao Li<sup>a</sup>, Peng Wang<sup>a</sup>, Chengfeng Li<sup>a</sup>, Guangwu Wen<sup>a</sup>, and Xiaowei Li<sup>a, \*</sup>

<sup>a</sup>Institute of Engineering Ceramics, School of Materials Science and Engineering, Shandong University of Technology, Zibo 255000, China

<sup>b</sup>School of Physics and Optoelectronic Engineering, Shandong University of Technology, Zibo 255000, China

<sup>c</sup>School of Agricultural Engineering and Food Science, Shandong University of Technology, Zibo 255000, China

\*Corresponding Author, E-mail: niuzh@sdut.edu.cn(Zhihui Niu); weis.lee@163.com(Xiaowei Li)

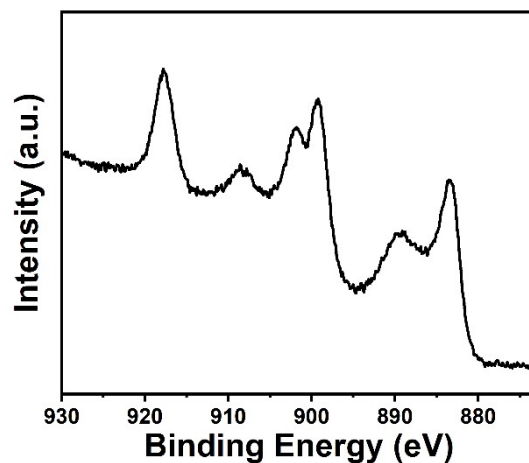

**Figure S1.** High resolution Ce 3d XPS spectrum of CeMnOx.

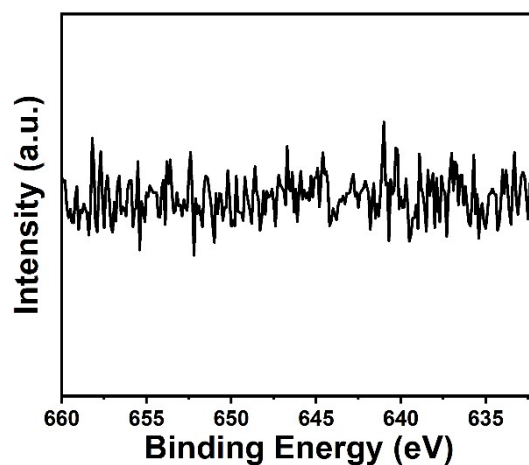

**Figure S2.** High resolution Mn 2p XPS spectrum of CeMnOx.

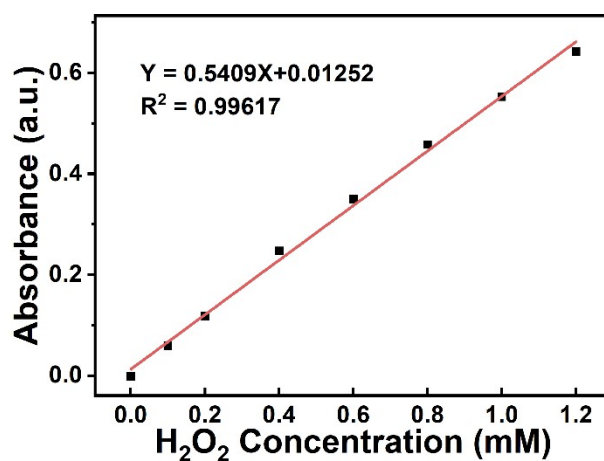

**Figure S3.** The standard curve of H<sub>2</sub>O<sub>2</sub> generation measured by UV-vis at 405 nm.

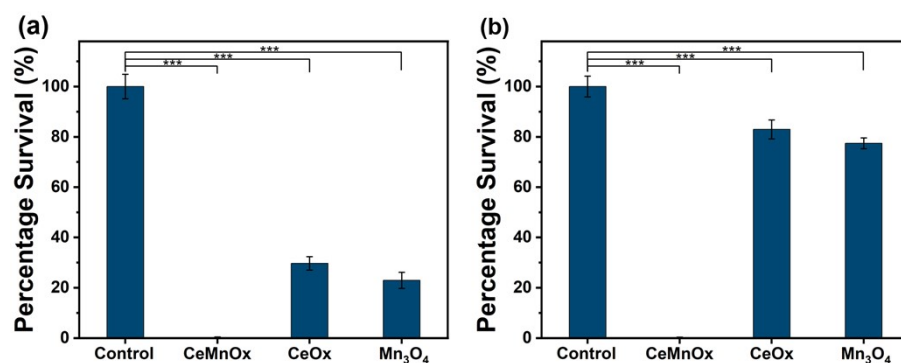

**Figure S4.** Relative bacterial viability of (a) *E. coli* and (b) *S. aureus* of bacterial colonies in corresponding treated groups.

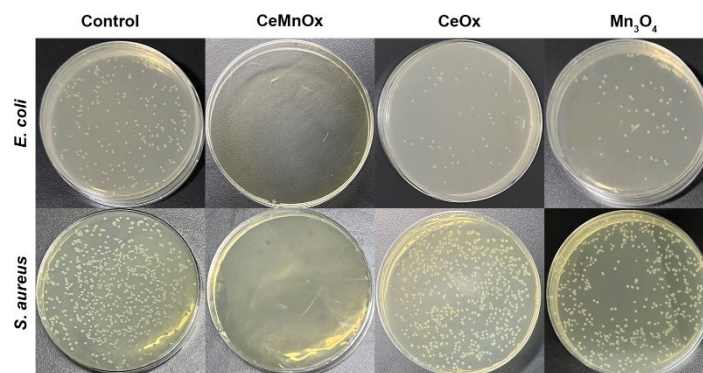

**Figure S5.** Photographs of bacterial colonies in CeMnOx, CeOx and Mn<sub>3</sub>O<sub>4</sub> treated groups.

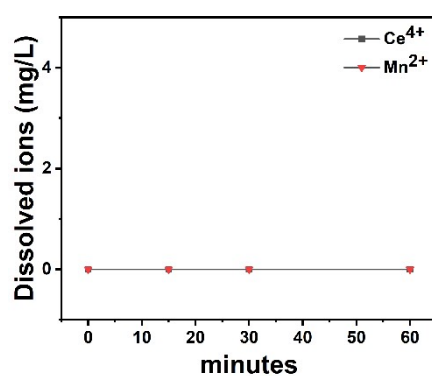

**Figure S6.** Ion release profiles of Ce<sup>4+</sup> and Cu<sup>2+</sup> in 1 hour under physiological conditions.

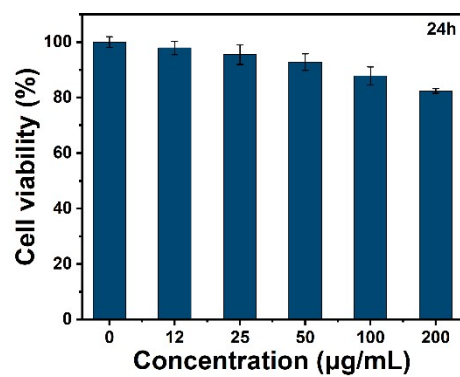

**Figure S7.** Viability of 3T3 cells treated with varied concentrations of CeMnOx under physiological conditions.
